# Supplementary material for: An Interspecific Fungal Hybrid Reveals Cross-Kingdom Rules for Allopolyploid Gene Expression Patterns
Source: PubMed Central journal article supplement (PMC3945203; doi:10.1371/journal.pgen.1004180), 2014-03-06

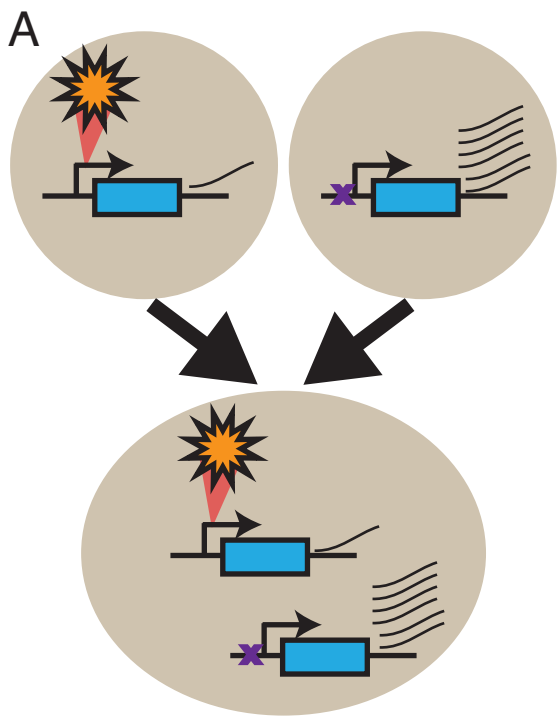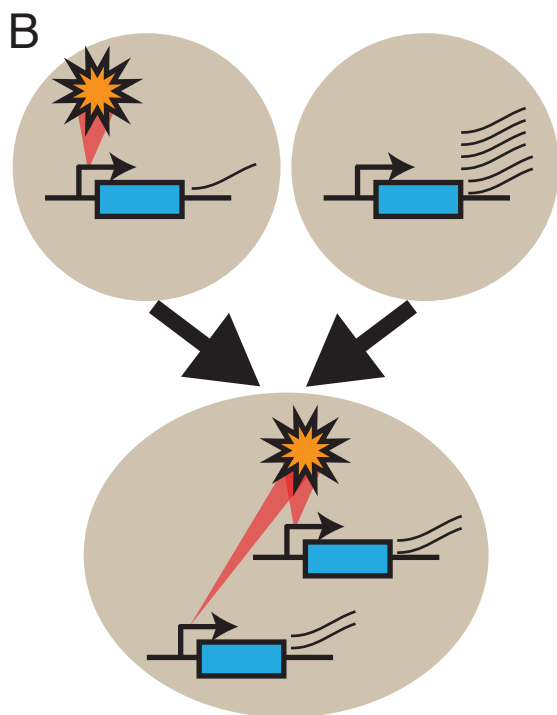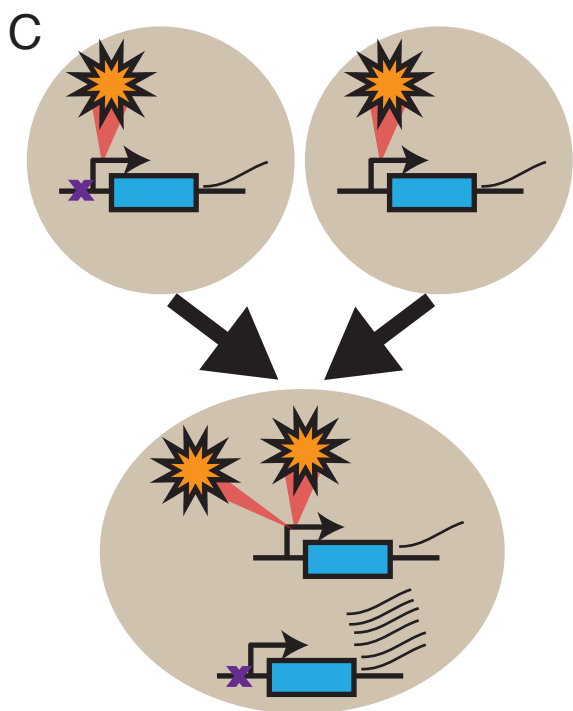

Supplement: pgen.1004180.s004.pdf [file pgen.1004180.s004.pdf]
